# Supplementary material
Source: HighWire-hosted journal article supplement (https://cmaj.ca/highwire/filestream/58852/field_highwire_adjunct_files/1/home-kerry-2-at.pdf)
Supplement: home-kerry-2-at.pdf [file home-kerry-2-at.pdf]

**Appendix 2: Diastolic blood pressure in intervention and control groups (as supplied by the authors)**

|                                                                      | Mean (SD) blood pressure (mm Hg) |                        |                      | Mean difference(95% CI) from baseline (mmHg) |                      | Intervention- control<br>Mean (95% CI) Difference in fall<br>(mmHg)* |                                     |
|----------------------------------------------------------------------|----------------------------------|------------------------|----------------------|----------------------------------------------|----------------------|----------------------------------------------------------------------|-------------------------------------|
|                                                                      | Baseline<br>(n=337)**            | 6 months<br>(n=352)*** | 12 months<br>(n=337) | 6 months<br>(n=352)                          | 12 months<br>(n=337) | Baseline to 6<br>months<br>(n=352)                                   | Baseline to 12<br>months<br>(n=337) |
| <b>Diastolic blood pressure all subjects</b>                         |                                  |                        |                      |                                              |                      |                                                                      |                                     |
| Intervention (n=168)                                                 | 75.5 (11.5)                      | 74.1 (12.3)            | 73.9 (12.3)          | 1.8 (0.2, 3.3)                               | 1.6 (-0.1, 3.3)      | 0.0 (-1.9, 2.0)                                                      | 0.2 (-2.0, 2.3)                     |
| Control (n=169)                                                      | 72.7 (10.6)                      | 72.4 (11.1)            | 72.5 (11.0)          | 0.6 (-1.0, 2.2)                              | 0.2 (-1.5, 1.9)      |                                                                      |                                     |
| <b>Patients with Rankin score &lt;=1</b>                             |                                  |                        |                      |                                              |                      |                                                                      |                                     |
| Intervention (n=93)                                                  | 76.5 (11.6)                      | 73.9 (12.5)            | 74.4 (12.7)          | 2.7 (0.5, 4.9)                               | 2.1(-0.2, 4.3)       | 0.2 (-2.4, 2.8)                                                      | -0.3 (-3.2, 2.6)                    |
| Control (n=93)                                                       | 73.5 (10.1)                      | 72.3 (11.1)            | 72.7 (10.4)          | 1.0 (-1.0, 3.0)                              | 0.8(-1.2, 2.8)       |                                                                      |                                     |
| <b>Patients with Rankin score &gt;=2</b>                             |                                  |                        |                      |                                              |                      |                                                                      |                                     |
| Intervention (n=75)                                                  | 74.2 (11.3)                      | 74.4 (12.2)            | 73.2 (12.0)          | -0.0 (-2.7, 2.6)                             | 1.0 (-1.6, 3.6)      | -0.2 (-3.1, 2.8)                                                     | 0.7 (-2.4, 3.9)                     |
| Control (n=76)                                                       | 71.7 (11.1)                      | 72.5 (11.2)            | 72.3 (11.8)          | 0.7 (-1.5, 3.0)                              | -0.6 (-3.4, 2.2)     |                                                                      |                                     |
| Interaction p-value                                                  |                                  |                        |                      |                                              |                      | 0.81                                                                 | 0.73                                |
| <b>Patients with baseline BP reading &gt; 140/90 and &lt;200/100</b> |                                  |                        |                      |                                              |                      |                                                                      |                                     |
| Intervention (n=68)                                                  | 79.5 (10.6)                      | 74.3 (11.8)            | 73.4 (12.1)          | 5.5 (3.6, 7.3)                               | 6.1 (3.6, 8.6)       | 0.1 (-2.9, 3.1)                                                      | 1.8 (-1.5, 5.0)                     |
| Control (n=65)                                                       | 78.4 (9.9)                       | 73.9 (10.5)            | 74.5 (11.0)          | 5.2 (2.8, 7.5)                               | 3.9 (1.6, 6.3)       |                                                                      |                                     |
| <b>Patients with baseline BP reading &lt;=140/90</b>                 |                                  |                        |                      |                                              |                      |                                                                      |                                     |
| Intervention (n=94)                                                  | 71.0 (9.3)                       | 72.9 (11.9)            | 73.3 (12.0)          | -1.9 (-4.0,0.1)                              | -2.3 (-4.4, -0.2)    | -0.0 (-2.5, 2.5)                                                     | -0.4 (-3.0, 2.3)                    |
| Control (n=102)                                                      | 68.8 (9.0)                       | 71.4 (11.5)            | 71.5 (10.9)          | -2.6 (-4.4, -0.7)                            | -2.7 (-4.8, -0.7)    |                                                                      |                                     |
| Interaction p value                                                  |                                  |                        |                      |                                              |                      | 0.97                                                                 | 0.32                                |

\* Adjusted for stratification factors (age,sex and Rankin score) and baseline diastolic blood pressure

\*\* Baseline data for patients followed up for 12 months

\*\*\* 175 intervention and 177 control patients were followed up for six months
